# Supplementary material
Source: MDPI journal article supplement (https://www.mdpi.com/1996-1073/14/16/5115)
Supplement: s1 [file s1]

# Combination of Metal Oxide and Polytriarylamine: a Design Principle to Improve the Stability of Perovskite Solar Cells

Marina M. Tepliakova <sup>1\*</sup>, Alexandra N. Mikheeva <sup>1</sup>, Pavel A. Somov <sup>1</sup>, Eugene Statnik <sup>1</sup>, Alexander M. Korsunsky <sup>1,2</sup>, and Keith J. Stevenson <sup>1</sup>.

<sup>1</sup> Center for Energy Science and Technology (CEST), Skolkovo Institute of Science and Technology, Nobel st. 3, 143026 Moscow, Russia

<sup>2</sup> Multi-Beam Laboratory for Engineering Microscopy, Department of Engineering Science, University of Oxford, Parks Road, Oxford OX1 3PJ, United Kingdom

\* Corresponding author: [Marina.Tepliakova@skoltech.ru](mailto:Marina.Tepliakova@skoltech.ru)

## Content

|                                                                                                                                                                                                                       |   |
|-----------------------------------------------------------------------------------------------------------------------------------------------------------------------------------------------------------------------|---|
| Figure S1. Structures of PTAA and PCBA.....                                                                                                                                                                           | 2 |
| Figure S2. Stability of devices with 15, 30, and 45 nm of VOx under continuous light soaking 70 mW/cm <sup>2</sup> and temperature 55±3°C. The device configuration is ITO/ZnO/CsFAPbI <sub>3</sub> /PTAA/Al .....    | 3 |
| Figure S3. Characteristics of perovskite solar cells incorporating various thicknesses of WOx.....                                                                                                                    | 4 |
| Figure S4. EQE for perovskite solar cells with configuration ITO/SnO <sub>2</sub> /PCBA/CH <sub>3</sub> NH <sub>3</sub> PbI <sub>3</sub> /PTAA/MOx/Ag, where MOx is MoOx 10 nm (a), VOx 30 nm (b); WOx 20 nm (c)..... | 5 |

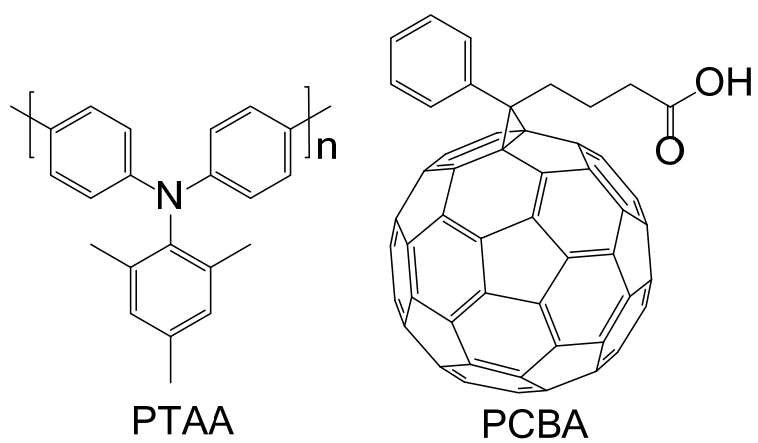

**Figure S1.** Structures of PTAA and PCBA

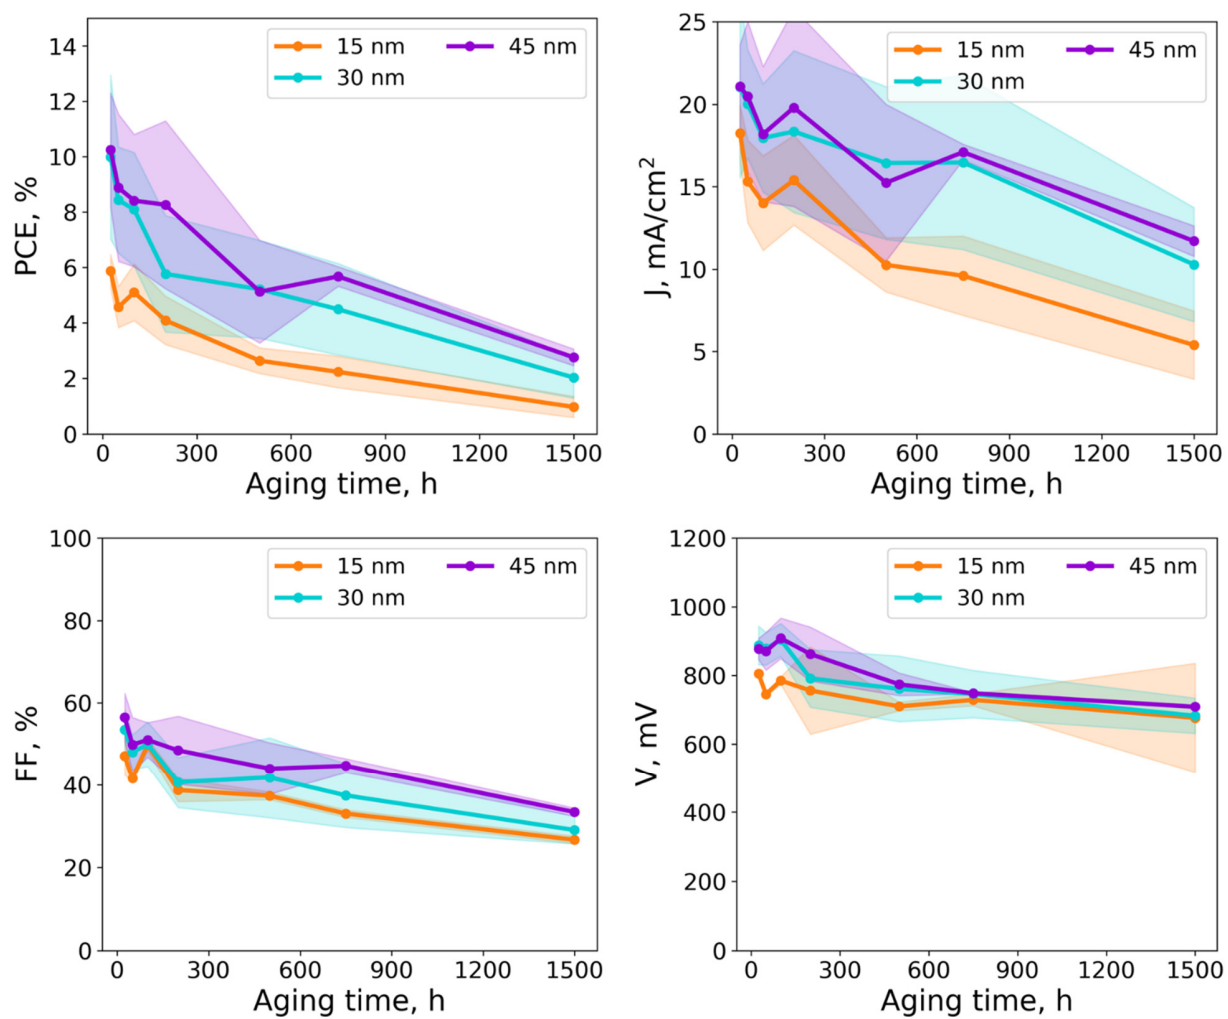

**Figure S2.** Stability of devices with 15, 30, and 45 nm of VOx under continuous light soaking 70 mW/cm<sup>2</sup> and temperature 55±3°C. The device configuration is ITO/ZnO/CsFAPbI<sub>3</sub>/PTAA/Al

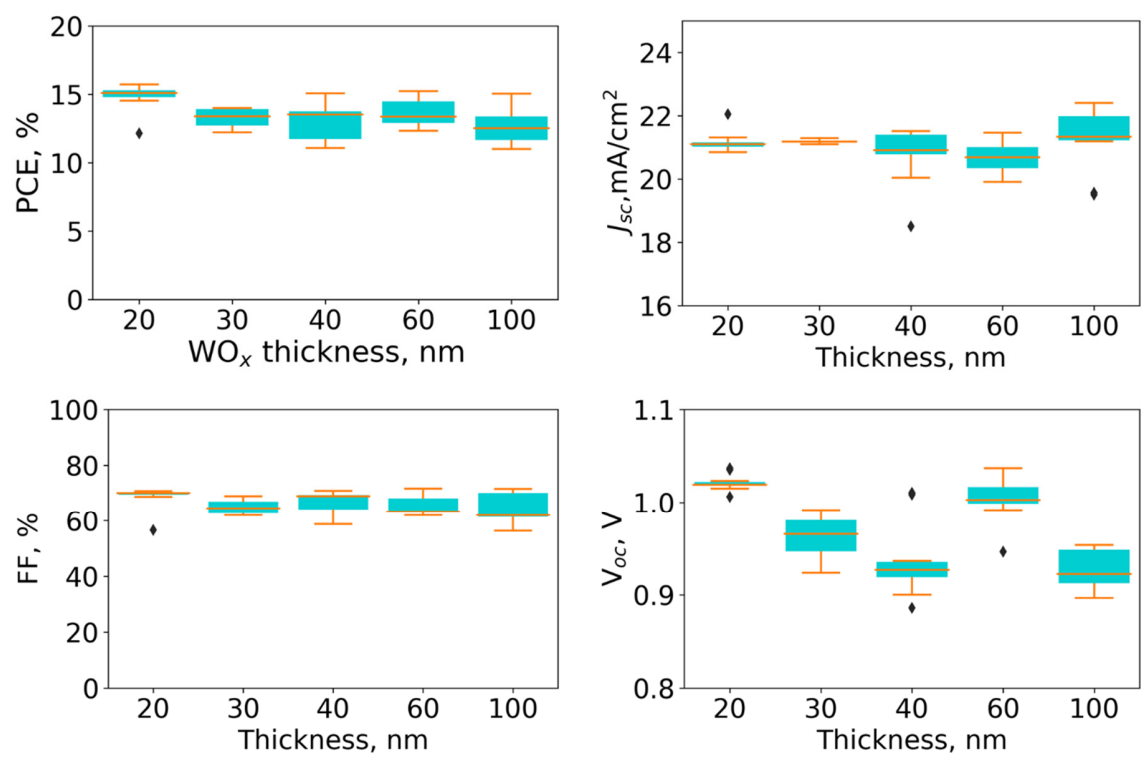

**Figure S3.** Characteristics of perovskite solar cells incorporating various thicknesses of WO<sub>x</sub>

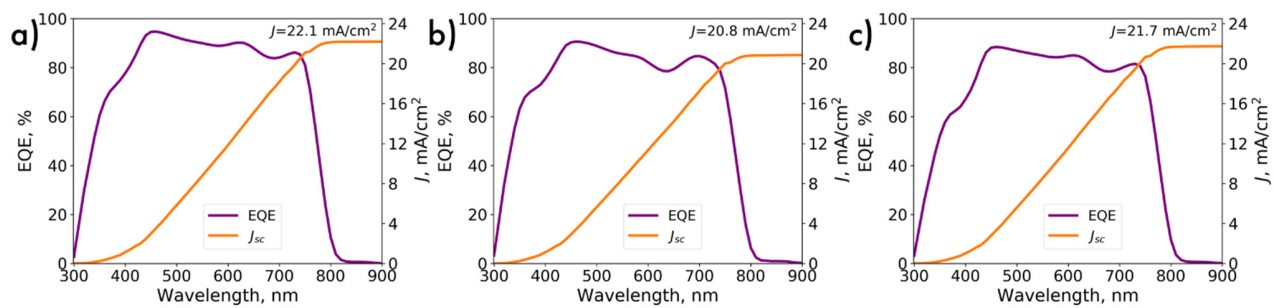

**Figure S4.** EQE of perovskite solar cells with configuration ITO/SnO<sub>2</sub>/PCBA/CH<sub>3</sub>NH<sub>3</sub>PbI<sub>3</sub>/PTAA/MO<sub>x</sub>/Ag, where MO<sub>x</sub> is MoO<sub>x</sub> 10 nm (a), VO<sub>x</sub> 30 nm (b); WO<sub>x</sub> 20 nm (c).
